# Supplementary material for: A Prussian blue analogue as a long-life cathode for liquid-state and solid-state sodium-ion batteries
Source: Royal Society of Chemistry journal article supplement (doi:10.1039/d0qi00872a), 2020-01-01
Supplement: d0qi00872a1.pdf [file d0qi00872a1.pdf]

## Electronic Supplementary Information

# Prussian Blue Analogue as a Long Life Cathode for Liquid-State and Solid-State Sodium-Ion Batteries

Tianbei Huang,<sup>a,b</sup> Guangyuan Du,<sup>a,b</sup> Yuruo Qi<sup>a,b,\*</sup> Jie Li,<sup>a,b</sup> Wei Zhong,<sup>a,b</sup> Qiuju Yang,<sup>a,b</sup> Xuan Zhang,<sup>a,b,\*</sup> and Maowen Xu<sup>a,b,\*</sup>

<sup>a</sup>Key Laboratory of Luminescence Analysis and Molecular Sensing (Southwest University), Ministry of Education, School of Materials and Energy, Southwest University, Chongqing 400715, P. R. China;

<sup>b</sup>Chongqing Key Lab for Advanced Materials and Clean Energies of Technologies, School of Materials and Energy, Southwest University, Chongqing, 400715, P.R. China.

\* Corresponding author:

E-mail: xumaowen@swu.edu.cn; qiyuruo@swu.edu.cn

|                                                                                                                                                                      |   |
|----------------------------------------------------------------------------------------------------------------------------------------------------------------------|---|
| <b>Fig. S1</b> XRD patterns of two NiFe-PBA materials synthesized with/without citrate ions.                                                                         | 3 |
| <b>Fig. S2</b> TGA curves of two NiFe-PBA materials synthesized (a) with citrate ions, (b) without citrate ions at a rate of 10 °C/min in N <sub>2</sub> atmosphere. | 4 |
| <b>Fig. S3</b> Infrared spectrum of two NiFe-PBA materials synthesized with/without citrate ions.                                                                    | 5 |
| <b>Fig. S4</b> The first three charge/discharge profiles of NiFe-PBA without citrate ions electrode at a current density of 0.1 A g <sup>-1</sup> .                  | 6 |
| <b>Table S1.</b> ICP results of two NiFe-PBA materials synthesized with/without citrate ions.                                                                        | 7 |
| <b>Table S2.</b> The sodium storage properties of reported Prussian Blue Analogues.                                                                                  | 8 |
| <b>References</b>                                                                                                                                                    | 9 |

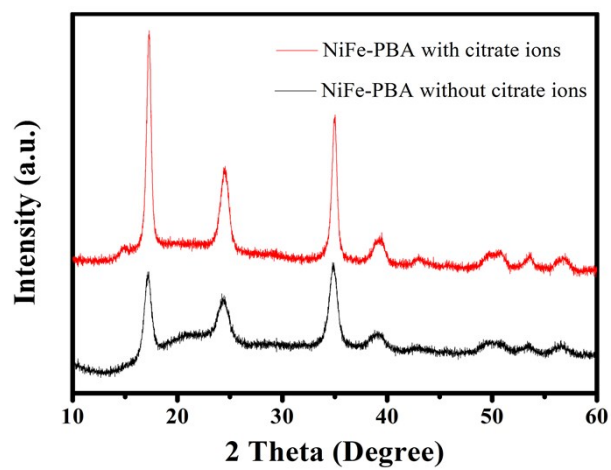

**Fig. S1** XRD patterns of two NiFe-PBA materials synthesized with/without citrate ions.

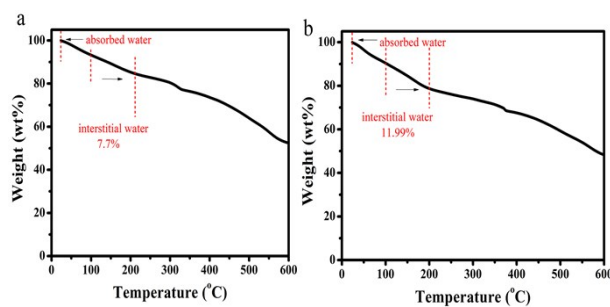

**Fig. S2** TGA curves of two NiFe-PBA materials synthesized (a) with citrate ions, (b) without citrate ions at a rate of 10 °C/min in N<sub>2</sub> atmosphere.

The surface adsorbed water are evaporated from room temperature to 100 °C, while the weight loss in temperature range of 100 to 200 °C was ascribed to the interstitial water. As displayed in Fig. S2, the water content of the NiFe-PBA with citrate ions (7.7%) is smaller than that of sample prepared without citrate ions (11.99%). This is an indication that the citrate dehydrate may reduce material defects. Therefore, it is beneficial to improve the electrochemical performance of the NiFe-PBA.

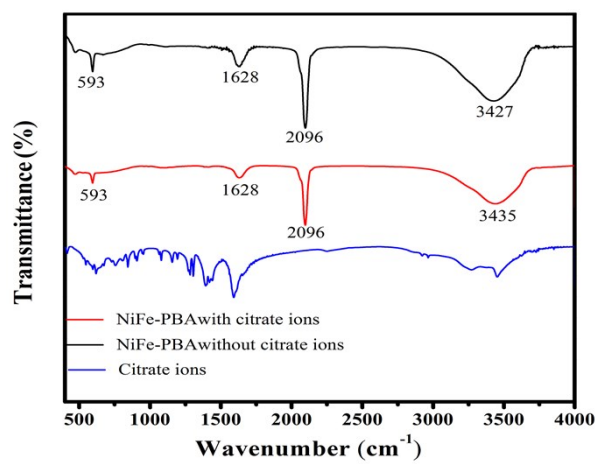

**Fig. S3** Infrared spectrum of two NiFe-PBA materials synthesized with/without citrate ions.

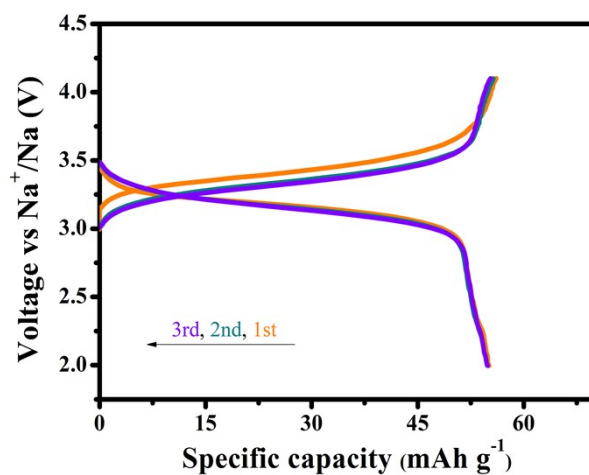

**Fig. S4** The first three charge/discharge profiles of NiFe-PBA without citrate ions electrode at a current density of 0.1 A g<sup>-1</sup>.

The initial discharge specific capacity of the NiFe-PBA without citrate ions is only 55.1 mAh g<sup>-1</sup>, which is much lower than that of the NiFe-PBA with citrate ions (70.9 mAh g<sup>-1</sup>).

**Table S1.** ICP results of two NiFe-PBA materials synthesized with/without citrate ions.

|                               | Na         | Fe         | Ni         |
|-------------------------------|------------|------------|------------|
| As-prepared NiFe-PBA          | 0.395mg/L  | 0.47 mg/L  | 0.55 mg/L  |
| NiFe-PBA without citrate ions | 0.196 mg/L | 0.292 mg/L | 0.351 mg/L |

According to ICP results, the chemical formulas of two NiFe-PBA materials synthesized with/without citrate ions are  $\text{Na}_{1.82}\text{Ni}[\text{Fe}(\text{CN})_6]_{0.90} \cdot 2.7\text{H}_2\text{O}$  and  $\text{Na}_{1.42}\text{Ni}[\text{Fe}(\text{CN})_6]_{0.85} \cdot 6.7\text{H}_2\text{O}$ , respectively. It can also be found from the value of the defect in the chemical formula, the increase of  $\text{Fe}(\text{CN})_6$  vacancies reduces the content of Na in the crystal lattice and therefore also reduces the initial charge capacity.

**Table S2.** The sodium storage properties of reported Prussian Blue Analogues.

| Materials                                                                                            | Electrolyte                                               | Rate<br>/A g <sup>-1</sup> | Cycle Number<br>(capacity<br>retention) | Final<br>capacity<br>/m Ah g <sup>-1</sup> |
|------------------------------------------------------------------------------------------------------|-----------------------------------------------------------|----------------------------|-----------------------------------------|--------------------------------------------|
| Na <sub>1.82</sub> Ni[Fe(CN) <sub>6</sub> ] <sub>0.89</sub> •<br>4.8H <sub>2</sub> O                 | 1.0 M NaClO <sub>4</sub> in<br>EC: DEC=1:1<br>with 5% FEC | 0.1                        | 1120                                    | 60.8                                       |
| Na <sub>1.76</sub> Ni[Fe(CN) <sub>6</sub> ] <sub>0.94</sub> <sup>1</sup>                             | 1.0 M NaClO <sub>4</sub> in<br>EC: PC=1:1 with<br>5% FEC  | 0.1                        | 500                                     | <55                                        |
| Na <sub>1.46</sub> Ni[Fe(CN) <sub>6</sub> ] <sub>0.83</sub> •<br>2.2H <sub>2</sub> O <sup>2</sup>    | 1.0 M NaClO <sub>4</sub> in<br>EC: DEC=1:1                | 0.08                       | 200                                     | 66.8                                       |
| K <sub>0.09</sub> Ni[Fe(CN) <sub>6</sub> ] <sub>0.71</sub> •<br>6H <sub>2</sub> O <sup>3</sup>       | 1 M NaPF <sub>6</sub> in<br>EC: PC=1:1                    | 0.02                       | 200                                     | 66                                         |
| Na <sub>1.01~1.41</sub> Ni[Fe(CN) <sub>6</sub> ] <sub>1.02~0.91</sub> <sup>4</sup>                   | 1.0 M NaClO <sub>4</sub> in<br>EC: DEC=1:1                | 0.1                        | 200                                     | <60                                        |
| Na <sub>1.014</sub> Ni[Fe(CN) <sub>6</sub> ] <sub>0.818</sub> •<br>3.53H <sub>2</sub> O <sup>5</sup> | 1.0 M NaClO <sub>4</sub> in<br>EC: DEC=1:1                | 0.01                       | 100                                     | 68                                         |
| Na <sub>1.20</sub> Ni[Fe(CN) <sub>6</sub> ] <sub>0.65</sub> <sup>6</sup>                             | /                                                         | 0.03                       | 50                                      | 66                                         |



## References

1. W. Zhang, Y. Zhao, V. Malgras, Q. Ji, D. Jiang, R. Qi, K. Ariga, Y. Yamauchi, J. Liu, J.-S. Jiang and M. Hu, Synthesis of Monocrystalline Nanoframes of Prussian Blue Analogues by Controlled Preferential Etching, *Angewandte Chemie International Edition*, 2016, **55**, 8228-8234.
2. Z. Ji, B. Han, H. Liang, C. Zhou, Q. Gao, K. Xia and J. Wu, On the Mechanism of the Improved Operation Voltage of Rhombohedral Nickel Hexacyanoferrate as Cathodes for Sodium-Ion Batteries, *ACS Applied Materials & Interfaces*, 2016, **8**, 33619-33625.
3. Y. You, X.-L. Wu, Y.-X. Yin and Y.-G. Guo, A zero-strain insertion cathode material of nickel ferricyanide for sodium-ion batteries, *Journal of Materials Chemistry A*, 2013, **1**, 14061-14065.
4. Y. Yue, A. J. Binder, B. Guo, Z. Zhang, Z.-A. Qiao, C. Tian and S. Dai, Mesoporous Prussian Blue Analogues: Template-Free Synthesis and Sodium-Ion Battery Applications, *Angewandte Chemie International Edition*, 2014, **53**, 3134-3137.
5. S. Yu, Y. Li, Y. Lu, B. Xu, Q. Wang, M. Yan and Y. Jiang, A promising cathode material of sodium iron–nickel hexacyanoferrate for sodium ion batteries, *Journal of Power Sources*, 2015, **275**, 45-49.
6. X. Bie, K. Kubota, T. Hosaka, K. Chihara and S. Komaba, Synthesis and electrochemical properties of Na-rich Prussian blue analogues containing Mn, Fe, Co, and Fe for Na-ion batteries, *Journal of Power Sources*, 2018, **378**, 322-330.
